# Supplementary material for: Computational design of SARS-CoV-2 peptide binders with better predicted binding affinities than human ACE2 receptor
Source: PubMed Central journal article supplement (PMC8329052; doi:10.1038/s41598-021-94873-3), 2021-08-02
Supplement: 41598_2021_94873_MOESM1_ESM.pdf [file 41598_2021_94873_MOESM1_ESM.pdf]

# Computational design of SARS-CoV-2 peptide binders with better predicted binding affinities than human ACE2 receptor

*Thassanai Sitthiyotha<sup>a</sup>, Surasak Chunsrivirot<sup>a,b,\*</sup>*

*<sup>a</sup>Structural and Computational Biology Research Unit, Department of Biochemistry, Faculty of Science, Chulalongkorn University, Pathumwan, Bangkok 10330, Thailand*

*<sup>b</sup>Department of Biochemistry, Faculty of Science, Chulalongkorn University, Pathumwan, Bangkok 10330, Thailand*

*\*Surasak Chunsrivirot*

*Email: surasak.ch@chula.ac.th*

## Contents

**Figure S1.** RMSD plots of designed peptides in complex with SARS-CoV-2-RBD, S2-S3

**Figure S2.** RMSD plots of designed peptides with predicted binding affinities to SARS-CoV-2-RBD better than or similar to ACE2 in water, S4

**Table S1.** The binding free energies of ACE2, SBP1, SPB25 and all designed peptides to SARS-CoV-2-RBD as calculated by Rosetta and MM-GBSA method, S5-S11

**Table S2:** Hydrogen bond occupations of ACE2, SBP1, SPB25 and designed peptides binding to SARS-CoV-2-RBD, S12-S15

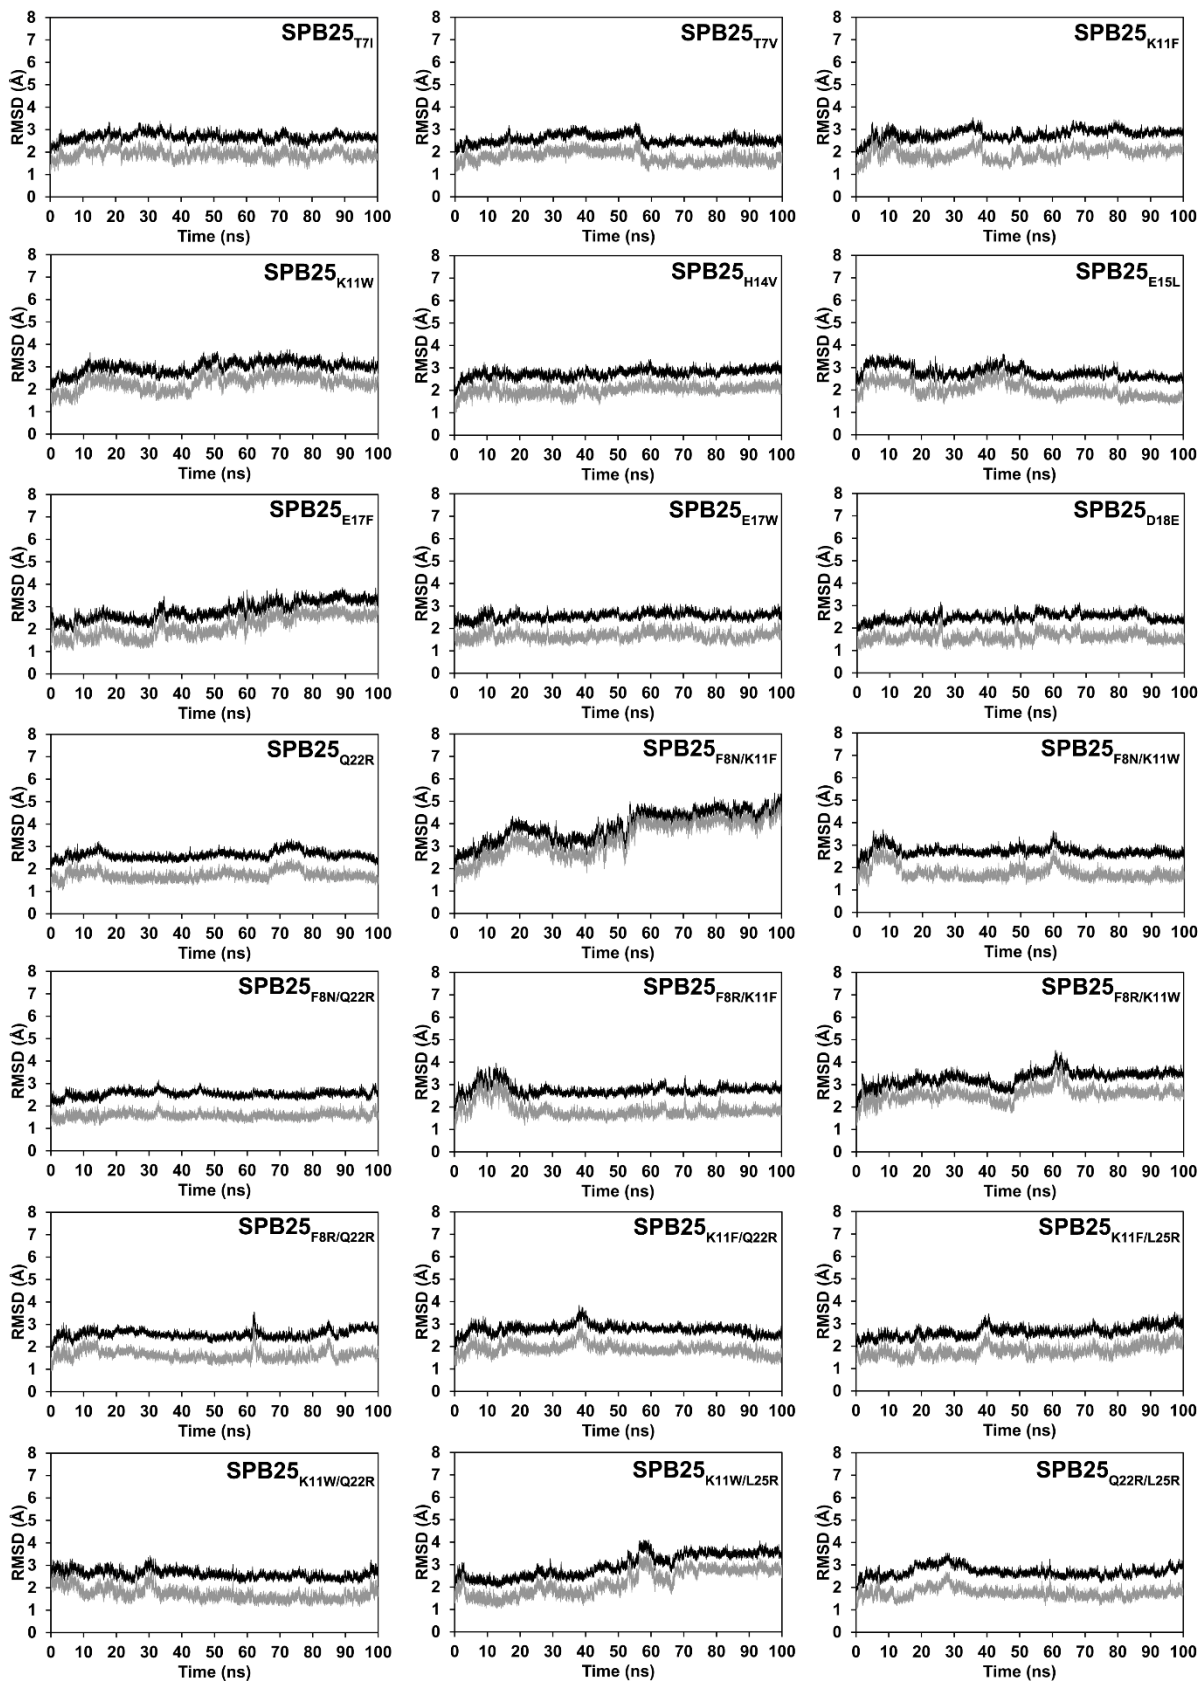

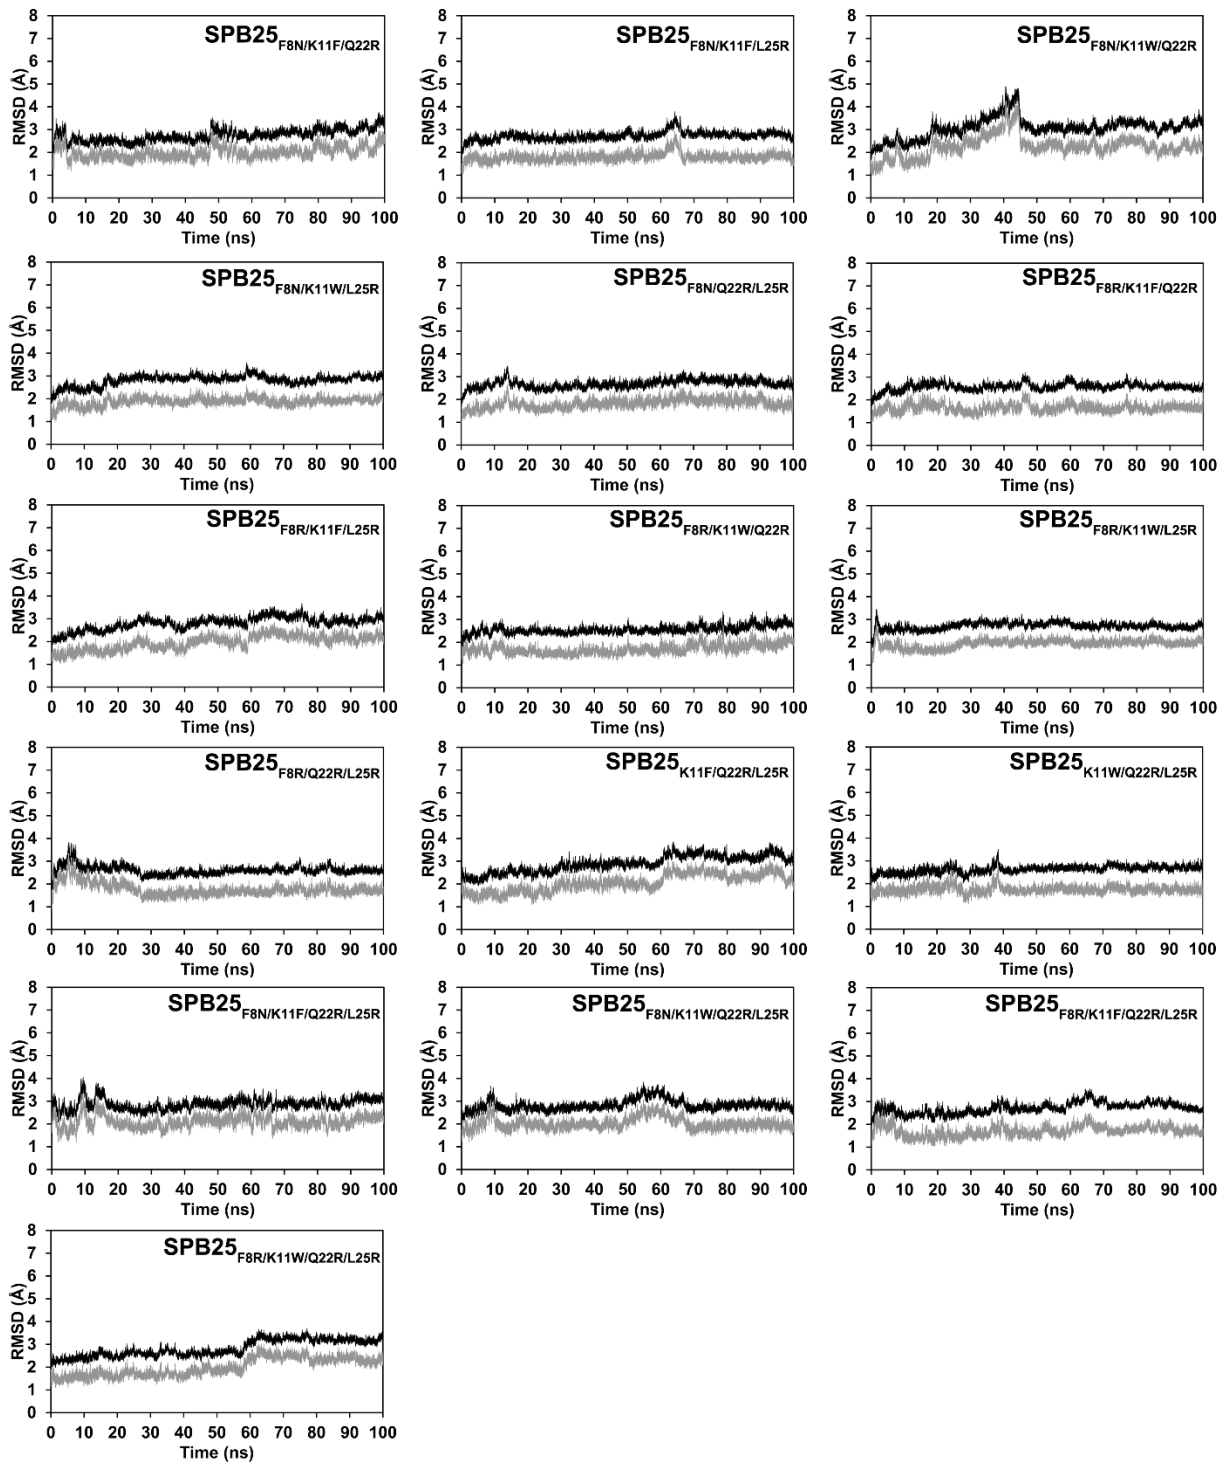

**Figure S1.** RMSD plots of designed peptides in complex with SARS-CoV-2-RBD. The RMSD values of all atoms and backbone atoms are shown in black and grey, respectively.

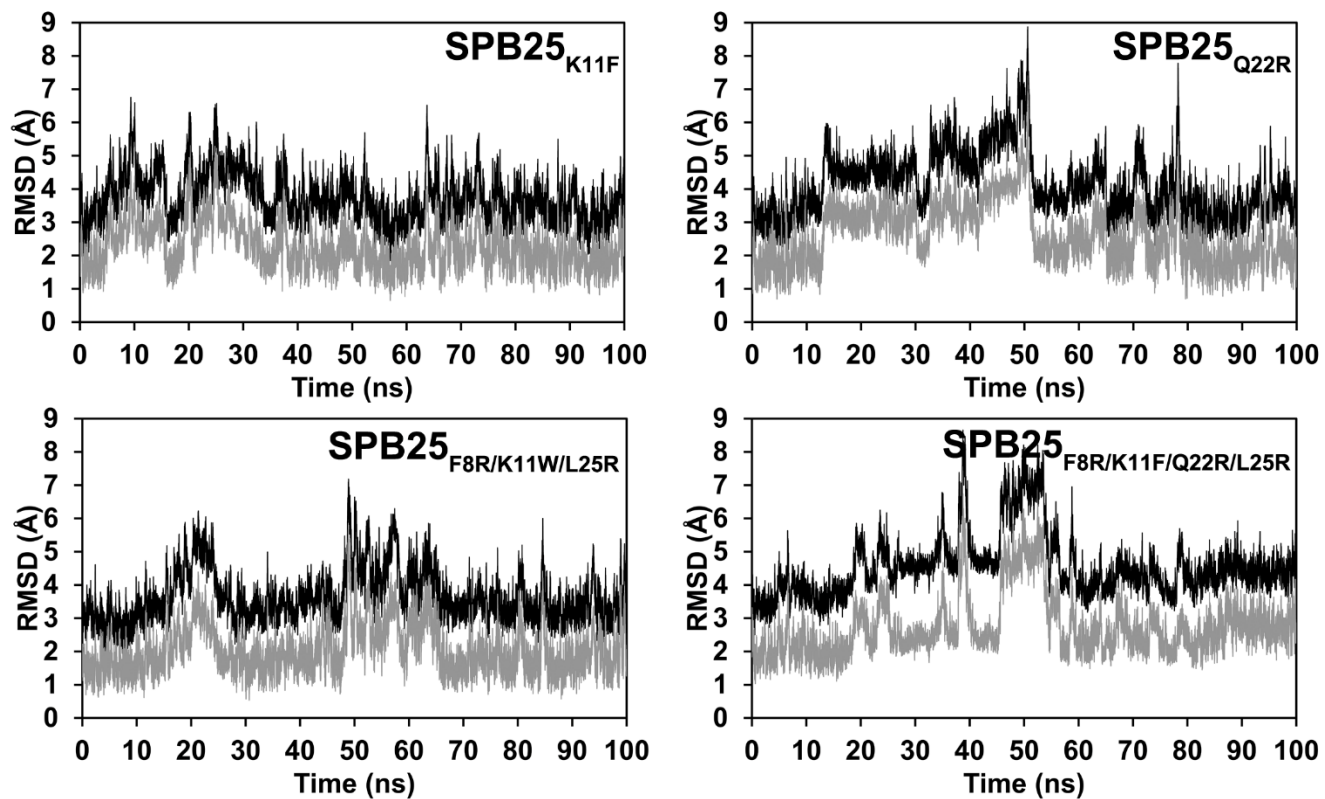

**Figure S2.** RMSD plots of designed peptides with predicted binding affinities to SARS-CoV-2-RBD better than or similar to ACE2 in water. The RMSD values of all atoms and backbone atoms are shown in black and grey respectively.

**Table S1.** The binding free energies of ACE2, SBP1, SPB25 and all designed peptides to SARS-CoV-2-RBD as calculated by Rosetta and MM-GBSA method.

| <b>System</b>        | $\Delta\Delta G_{\text{bind}}$ (Rosetta) <sup>a</sup><br>(REU) | $\Delta G_{\text{bind}}$ (MM-GBSA)<br>(kcal/mol) | $\Delta\Delta G_{\text{bind}}$ (MM-GBSA) <sup>b</sup><br>(kcal/mol) |
|----------------------|----------------------------------------------------------------|--------------------------------------------------|---------------------------------------------------------------------|
| ACE2                 | -                                                              | -71.2 ± 0.4                                      | -10.9 ± 0.6                                                         |
| SBP1                 | -                                                              | -55.1 ± 0.4                                      | 5.2 ± 0.6                                                           |
| SPB25                | 0.0                                                            | -60.3 ± 0.4                                      | 0.0 ± 0.6                                                           |
| SPB25 <sub>Q4A</sub> | 3.1                                                            | -                                                | -                                                                   |
| SPB25 <sub>Q4D</sub> | 8.4                                                            | -                                                | -                                                                   |
| SPB25 <sub>Q4E</sub> | 2.0                                                            | -                                                | -                                                                   |
| SPB25 <sub>Q4H</sub> | 3.4                                                            | -                                                | -                                                                   |
| SPB25 <sub>Q4I</sub> | 0.8                                                            | -                                                | -                                                                   |
| SPB25 <sub>Q4L</sub> | 0.6                                                            | -                                                | -                                                                   |
| SPB25 <sub>Q4M</sub> | 5.5                                                            | -                                                | -                                                                   |
| SPB25 <sub>Q4R</sub> | 3.1                                                            | -                                                | -                                                                   |
| SPB25 <sub>Q4S</sub> | 3.9                                                            | -                                                | -                                                                   |
| SPB25 <sub>Q4T</sub> | 2.6                                                            | -                                                | -                                                                   |
| SPB25 <sub>Q4V</sub> | 1.4                                                            | -                                                | -                                                                   |
| SPB25 <sub>Q4W</sub> | 1.1                                                            | -                                                | -                                                                   |
| SPB25 <sub>T7A</sub> | 2.5                                                            | -                                                | -                                                                   |
| SPB25 <sub>T7D</sub> | 7.1                                                            | -                                                | -                                                                   |
| SPB25 <sub>T7F</sub> | 1.6                                                            | -                                                | -                                                                   |
| SPB25 <sub>T7H</sub> | 4.3                                                            | -                                                | -                                                                   |
| SPB25 <sub>T7I</sub> | -0.3                                                           | -59.2 ± 0.3                                      | 1.1 ± 0.5                                                           |
| SPB25 <sub>T7L</sub> | 0.1                                                            | -                                                | -                                                                   |
| SPB25 <sub>T7M</sub> | 2.3                                                            | -                                                | -                                                                   |
| SPB25 <sub>T7N</sub> | 7.1                                                            | -                                                | -                                                                   |
| SPB25 <sub>T7Q</sub> | 6.4                                                            | -                                                | -                                                                   |
| SPB25 <sub>T7R</sub> | 4.4                                                            | -                                                | -                                                                   |
| SPB25 <sub>T7S</sub> | 8.1                                                            | -                                                | -                                                                   |

| <b>System</b>         | <b><math>\Delta\Delta G_{\text{bind}}</math> (Rosetta)<sup>a</sup><br/>(REU)</b> | <b><math>\Delta G_{\text{bind}}</math> (MM-GBSA)<br/>(kcal/mol)</b> | <b><math>\Delta\Delta G_{\text{bind}}</math> (MM-GBSA)<sup>b</sup><br/>(kcal/mol)</b> |
|-----------------------|----------------------------------------------------------------------------------|---------------------------------------------------------------------|---------------------------------------------------------------------------------------|
| SPB25 <sub>T7V</sub>  | -0.4                                                                             | -50.9 ± 0.3                                                         | 9.4 ± 0.5                                                                             |
| SPB25 <sub>T7W</sub>  | 2.7                                                                              | -                                                                   | -                                                                                     |
| SPB25 <sub>T7Y</sub>  | 2.8                                                                              | -                                                                   | -                                                                                     |
| SPB25 <sub>D10A</sub> | 3.5                                                                              | -                                                                   | -                                                                                     |
| SPB25 <sub>D10C</sub> | 3.9                                                                              | -                                                                   | -                                                                                     |
| SPB25 <sub>D10E</sub> | 2.5                                                                              | -                                                                   | -                                                                                     |
| SPB25 <sub>D10H</sub> | 3.6                                                                              | -                                                                   | -                                                                                     |
| SPB25 <sub>D10I</sub> | 4.9                                                                              | -                                                                   | -                                                                                     |
| SPB25 <sub>D10K</sub> | 5.7                                                                              | -                                                                   | -                                                                                     |
| SPB25 <sub>D10L</sub> | 6.6                                                                              | -                                                                   | -                                                                                     |
| SPB25 <sub>D10M</sub> | 6.9                                                                              | -                                                                   | -                                                                                     |
| SPB25 <sub>D10N</sub> | 4.8                                                                              | -                                                                   | -                                                                                     |
| SPB25 <sub>D10Q</sub> | 5.2                                                                              | -                                                                   | -                                                                                     |
| SPB25 <sub>D10R</sub> | 5.4                                                                              | -                                                                   | -                                                                                     |
| SPB25 <sub>D10S</sub> | 2.1                                                                              | -                                                                   | -                                                                                     |
| SPB25 <sub>D10T</sub> | 7.3                                                                              | -                                                                   | -                                                                                     |
| SPB25 <sub>D10V</sub> | 4.8                                                                              | -                                                                   | -                                                                                     |
| SPB25 <sub>D10W</sub> | 3.1                                                                              | -                                                                   | -                                                                                     |
| SPB25 <sub>D10Y</sub> | 4.9                                                                              | -                                                                   | -                                                                                     |
| SPB25 <sub>K11A</sub> | 1.9                                                                              | -                                                                   | -                                                                                     |
| SPB25 <sub>K11E</sub> | 6.7                                                                              | -                                                                   | -                                                                                     |
| SPB25 <sub>K11F</sub> | -0.4                                                                             | -71.6 ± 0.6                                                         | -11.3 ± 0.7                                                                           |
| SPB25 <sub>K11H</sub> | 2.1                                                                              | -                                                                   | -                                                                                     |
| SPB25 <sub>K11I</sub> | 2.2                                                                              | -                                                                   | -                                                                                     |
| SPB25 <sub>K11M</sub> | 0.8                                                                              | -                                                                   | -                                                                                     |
| SPB25 <sub>K11N</sub> | 3.3                                                                              | -                                                                   | -                                                                                     |
| SPB25 <sub>K11Q</sub> | 2.3                                                                              | -                                                                   | -                                                                                     |
| SPB25 <sub>K11R</sub> | 2.4                                                                              | -                                                                   | -                                                                                     |
| SPB25 <sub>K11S</sub> | 4.7                                                                              | -                                                                   | -                                                                                     |

| <b>System</b>         | $\Delta\Delta G_{\text{bind}}$ (Rosetta) <sup>a</sup><br>(REU) | $\Delta G_{\text{bind}}$ (MM-GBSA)<br>(kcal/mol) | $\Delta\Delta G_{\text{bind}}$ (MM-GBSA) <sup>b</sup><br>(kcal/mol) |
|-----------------------|----------------------------------------------------------------|--------------------------------------------------|---------------------------------------------------------------------|
| SPB25 <sub>K11T</sub> | 8.4                                                            | -                                                | -                                                                   |
| SPB25 <sub>K11W</sub> | -2.2                                                           | -63.2 ± 0.4                                      | -2.9 ± 0.6                                                          |
| SPB25 <sub>K11Y</sub> | 0.3                                                            | -                                                | -                                                                   |
| SPB25 <sub>H14A</sub> | 3.0                                                            | -                                                | -                                                                   |
| SPB25 <sub>H14C</sub> | 2.7                                                            | -                                                | -                                                                   |
| SPB25 <sub>H14D</sub> | 4.0                                                            | -                                                | -                                                                   |
| SPB25 <sub>H14E</sub> | 4.6                                                            | -                                                | -                                                                   |
| SPB25 <sub>H14F</sub> | 5.3                                                            | -                                                | -                                                                   |
| SPB25 <sub>H14I</sub> | 2.4                                                            | -                                                | -                                                                   |
| SPB25 <sub>H14K</sub> | 5.2                                                            | -                                                | -                                                                   |
| SPB25 <sub>H14L</sub> | 6.6                                                            | -                                                | -                                                                   |
| SPB25 <sub>H14M</sub> | 5.1                                                            | -                                                | -                                                                   |
| SPB25 <sub>H14N</sub> | 3.9                                                            | -                                                | -                                                                   |
| SPB25 <sub>H14Q</sub> | 6.2                                                            | -                                                | -                                                                   |
| SPB25 <sub>H14R</sub> | 5.8                                                            | -                                                | -                                                                   |
| SPB25 <sub>H14S</sub> | 3.8                                                            | -                                                | -                                                                   |
| SPB25 <sub>H14T</sub> | 5.1                                                            | -                                                | -                                                                   |
| SPB25 <sub>H14V</sub> | -0.1                                                           | -58.2 ± 0.5                                      | 2.1 ± 0.6                                                           |
| SPB25 <sub>H14W</sub> | 4.9                                                            | -                                                | -                                                                   |
| SPB25 <sub>H14Y</sub> | 2.5                                                            | -                                                | -                                                                   |
| SPB25 <sub>E15A</sub> | 0.7                                                            | -                                                | -                                                                   |
| SPB25 <sub>E15D</sub> | 0.8                                                            | -                                                | -                                                                   |
| SPB25 <sub>E15F</sub> | 1.5                                                            | -                                                | -                                                                   |
| SPB25 <sub>E15H</sub> | 1.7                                                            | -                                                | -                                                                   |
| SPB25 <sub>E15I</sub> | 1.6                                                            | -                                                | -                                                                   |
| SPB25 <sub>E15K</sub> | 2.0                                                            | -                                                | -                                                                   |
| SPB25 <sub>E15L</sub> | -0.9                                                           | -51.7 ± 0.4                                      | 8.6 ± 0.6                                                           |
| SPB25 <sub>E15M</sub> | 1.2                                                            | -                                                | -                                                                   |
| SPB25 <sub>E15N</sub> | 1.3                                                            | -                                                | -                                                                   |

| <b>System</b>         | <b><math>\Delta\Delta G_{\text{bind}}</math> (Rosetta)<sup>a</sup><br/>(REU)</b> | <b><math>\Delta G_{\text{bind}}</math> (MM-GBSA)<br/>(kcal/mol)</b> | <b><math>\Delta\Delta G_{\text{bind}}</math> (MM-GBSA)<sup>b</sup><br/>(kcal/mol)</b> |
|-----------------------|----------------------------------------------------------------------------------|---------------------------------------------------------------------|---------------------------------------------------------------------------------------|
| SPB25 <sub>E15Q</sub> | 2.1                                                                              | -                                                                   | -                                                                                     |
| SPB25 <sub>E15R</sub> | 1.6                                                                              | -                                                                   | -                                                                                     |
| SPB25 <sub>E15S</sub> | 1.0                                                                              | -                                                                   | -                                                                                     |
| SPB25 <sub>E15T</sub> | 1.4                                                                              | -                                                                   | -                                                                                     |
| SPB25 <sub>E15V</sub> | 1.9                                                                              | -                                                                   | -                                                                                     |
| SPB25 <sub>E15W</sub> | 0.8                                                                              | -                                                                   | -                                                                                     |
| SPB25 <sub>E15Y</sub> | 1.6                                                                              | -                                                                   | -                                                                                     |
| SPB25 <sub>E17A</sub> | 0.5                                                                              | -                                                                   | -                                                                                     |
| SPB25 <sub>E17C</sub> | 3.8                                                                              | -                                                                   | -                                                                                     |
| SPB25 <sub>E17F</sub> | -0.9                                                                             | -47.7 ± 0.4                                                         | 12.6 ± 0.6                                                                            |
| SPB25 <sub>E17H</sub> | 1.9                                                                              | -                                                                   | -                                                                                     |
| SPB25 <sub>E17I</sub> | 2.1                                                                              | -                                                                   | -                                                                                     |
| SPB25 <sub>E17K</sub> | 2.6                                                                              | -                                                                   | -                                                                                     |
| SPB25 <sub>E17L</sub> | 1.3                                                                              | -                                                                   | -                                                                                     |
| SPB25 <sub>E17M</sub> | 3.1                                                                              | -                                                                   | -                                                                                     |
| SPB25 <sub>E17N</sub> | 6.2                                                                              | -                                                                   | -                                                                                     |
| SPB25 <sub>E17Q</sub> | 2.6                                                                              | -                                                                   | -                                                                                     |
| SPB25 <sub>E17R</sub> | 2.5                                                                              | -                                                                   | -                                                                                     |
| SPB25 <sub>E17S</sub> | 3.1                                                                              | -                                                                   | -                                                                                     |
| SPB25 <sub>E17T</sub> | 2.3                                                                              | -                                                                   | -                                                                                     |
| SPB25 <sub>E17W</sub> | -3.1                                                                             | -57.8 ± 0.5                                                         | 2.5 ± 0.6                                                                             |
| SPB25 <sub>E17Y</sub> | 0.6                                                                              | -                                                                   | -                                                                                     |
| SPB25 <sub>D18A</sub> | 7.1                                                                              | -                                                                   | -                                                                                     |
| SPB25 <sub>D18E</sub> | -0.5                                                                             | -55.4 ± 0.4                                                         | 4.9 ± 0.6                                                                             |
| SPB25 <sub>D18F</sub> | 4.3                                                                              | -                                                                   | -                                                                                     |
| SPB25 <sub>D18H</sub> | 2.5                                                                              | -                                                                   | -                                                                                     |
| SPB25 <sub>D18I</sub> | 2.0                                                                              | -                                                                   | -                                                                                     |
| SPB25 <sub>D18L</sub> | 1.1                                                                              | -                                                                   | -                                                                                     |
| SPB25 <sub>D18M</sub> | 4.5                                                                              | -                                                                   | -                                                                                     |



| <b>System</b>         | <b><math>\Delta\Delta G_{\text{bind}}</math> (Rosetta)<sup>a</sup><br/>(REU)</b> | <b><math>\Delta G_{\text{bind}}</math> (MM-GBSA)<br/>(kcal/mol)</b> | <b><math>\Delta\Delta G_{\text{bind}}</math> (MM-GBSA)<sup>b</sup><br/>(kcal/mol)</b> |
|-----------------------|----------------------------------------------------------------------------------|---------------------------------------------------------------------|---------------------------------------------------------------------------------------|
| SPB25 <sub>D18N</sub> | 4.3                                                                              | -                                                                   | -                                                                                     |
| SPB25 <sub>D18Q</sub> | 3.4                                                                              | -                                                                   | -                                                                                     |
| SPB25 <sub>D18R</sub> | 7.2                                                                              | -                                                                   | -                                                                                     |
| SPB25 <sub>D18S</sub> | 7.5                                                                              | -                                                                   | -                                                                                     |
| SPB25 <sub>D18T</sub> | 4.0                                                                              | -                                                                   | -                                                                                     |
| SPB25 <sub>D18V</sub> | 4.6                                                                              | -                                                                   | -                                                                                     |
| SPB25 <sub>D18W</sub> | 3.1                                                                              | -                                                                   | -                                                                                     |
| SPB25 <sub>D18Y</sub> | 4.4                                                                              | -                                                                   | -                                                                                     |
| SPB25 <sub>Y21A</sub> | 6.0                                                                              | -                                                                   | -                                                                                     |
| SPB25 <sub>Y21D</sub> | 9.5                                                                              | -                                                                   | -                                                                                     |
| SPB25 <sub>Y21E</sub> | 5.2                                                                              | -                                                                   | -                                                                                     |
| SPB25 <sub>Y21F</sub> | 3.2                                                                              | -                                                                   | -                                                                                     |
| SPB25 <sub>Y21H</sub> | 5.9                                                                              | -                                                                   | -                                                                                     |
| SPB25 <sub>Y21I</sub> | 7.0                                                                              | -                                                                   | -                                                                                     |
| SPB25 <sub>Y21K</sub> | 7.4                                                                              | -                                                                   | -                                                                                     |
| SPB25 <sub>Y21L</sub> | 4.4                                                                              | -                                                                   | -                                                                                     |
| SPB25 <sub>Y21N</sub> | 7.9                                                                              | -                                                                   | -                                                                                     |
| SPB25 <sub>Y21Q</sub> | 6.6                                                                              | -                                                                   | -                                                                                     |
| SPB25 <sub>Y21R</sub> | 5.2                                                                              | -                                                                   | -                                                                                     |
| SPB25 <sub>Y21S</sub> | 7.3                                                                              | -                                                                   | -                                                                                     |
| SPB25 <sub>Y21T</sub> | 5.1                                                                              | -                                                                   | -                                                                                     |
| SPB25 <sub>Y21V</sub> | 6.2                                                                              | -                                                                   | -                                                                                     |
| SPB25 <sub>Y21W</sub> | 4.0                                                                              | -                                                                   | -                                                                                     |
| SPB25 <sub>Q22A</sub> | 2.4                                                                              | -                                                                   | -                                                                                     |
| SPB25 <sub>Q22D</sub> | 4.3                                                                              | -                                                                   | -                                                                                     |
| SPB25 <sub>Q22E</sub> | 2.8                                                                              | -                                                                   | -                                                                                     |
| SPB25 <sub>Q22F</sub> | 0.4                                                                              | -                                                                   | -                                                                                     |
| SPB25 <sub>Q22H</sub> | 3.7                                                                              | -                                                                   | -                                                                                     |
| SPB25 <sub>Q22I</sub> | 2.0                                                                              | -                                                                   | -                                                                                     |

| System                         | $\Delta\Delta G_{\text{bind}}$ (Rosetta) <sup>a</sup><br>(REU) | $\Delta G_{\text{bind}}$ (MM-GBSA)<br>(kcal/mol) | $\Delta\Delta G_{\text{bind}}$ (MM-GBSA) <sup>b</sup><br>(kcal/mol) |
|--------------------------------|----------------------------------------------------------------|--------------------------------------------------|---------------------------------------------------------------------|
| SPB25 <sub>Q22K</sub>          | 3.4                                                            | -                                                | -                                                                   |
| SPB25 <sub>Q22L</sub>          | 0.7                                                            | -                                                | -                                                                   |
| SPB25 <sub>Q22M</sub>          | 2.7                                                            | -                                                | -                                                                   |
| SPB25 <sub>Q22N</sub>          | 1.5                                                            | -                                                | -                                                                   |
| SPB25 <sub>Q22R</sub>          | -0.4                                                           | -75.3 ± 0.5                                      | -15.0 ± 0.6                                                         |
| SPB25 <sub>Q22S</sub>          | 3.5                                                            | -                                                | -                                                                   |
| SPB25 <sub>Q22T</sub>          | 4.4                                                            | -                                                | -                                                                   |
| SPB25 <sub>Q22V</sub>          | 2.1                                                            | -                                                | -                                                                   |
| SPB25 <sub>Q22W</sub>          | 2.6                                                            | -                                                | -                                                                   |
| SPB25 <sub>F8N/K11F</sub>      | -3.4                                                           | -56.8 ± 0.4                                      | 3.5 ± 0.6                                                           |
| SPB25 <sub>F8N/K11W</sub>      | -6.6                                                           | -66.8 ± 0.5                                      | -6.5 ± 0.6                                                          |
| SPB25 <sub>F8N/Q22R</sub>      | -3.0                                                           | -58.0 ± 0.3                                      | 2.3 ± 0.5                                                           |
| SPB25 <sub>F8R/K11F</sub>      | -4.9                                                           | -69.7 ± 0.5                                      | -9.4 ± 0.6                                                          |
| SPB25 <sub>F8R/K11W</sub>      | -5.6                                                           | -69.5 ± 0.4                                      | -9.2 ± 0.6                                                          |
| SPB25 <sub>F8R/Q22R</sub>      | -1.5                                                           | -63.9 ± 0.3                                      | -3.6 ± 0.5                                                          |
| SPB25 <sub>K11F/Q22R</sub>     | -3.9                                                           | -53.7 ± 0.6                                      | 6.6 ± 0.7                                                           |
| SPB25 <sub>K11F/L25R</sub>     | -3.6                                                           | -63.1 ± 0.5                                      | -2.8 ± 0.6                                                          |
| SPB25 <sub>K11W/Q22R</sub>     | -4.0                                                           | -44.0 ± 0.4                                      | 16.3 ± 0.6                                                          |
| SPB25 <sub>K11W/L25R</sub>     | -3.6                                                           | -64.3 ± 0.4                                      | -4.0 ± 0.6                                                          |
| SPB25 <sub>Q22R/L25R</sub>     | -1.8                                                           | -47.7 ± 0.4                                      | 12.6 ± 0.6                                                          |
| SPB25 <sub>F8N/K11F/Q22R</sub> | -6.3                                                           | -48.5 ± 0.6                                      | 11.8 ± 0.7                                                          |
| SPB25 <sub>F8N/K11F/L25R</sub> | -3.9                                                           | -60.6 ± 0.5                                      | -0.3 ± 0.6                                                          |
| SPB25 <sub>F8N/K11W/Q22R</sub> | -5.8                                                           | -56.5 ± 0.5                                      | 3.8 ± 0.6                                                           |
| SPB25 <sub>F8N/K11W/L25R</sub> | -3.8                                                           | -61.7 ± 0.4                                      | -1.4 ± 0.6                                                          |
| SPB25 <sub>F8N/Q22R/L25R</sub> | -2.0                                                           | -58.1 ± 0.4                                      | 2.2 ± 0.6                                                           |
| SPB25 <sub>F8R/K11F/Q22R</sub> | -4.5                                                           | -59.3 ± 0.4                                      | 1.0 ± 0.6                                                           |
| SPB25 <sub>F8R/K11F/L25R</sub> | -2.4                                                           | -58.1 ± 0.4                                      | 2.2 ± 0.6                                                           |
| SPB25 <sub>F8R/K11W/Q22R</sub> | -3.6                                                           | -52.9 ± 0.4                                      | 7.4 ± 0.6                                                           |
| SPB25 <sub>F8R/K11W/L25R</sub> | -5.1                                                           | -75.0 ± 0.3                                      | -14.7 ± 0.5                                                         |

| <b>System</b>                       | <b><math>\Delta\Delta G_{\text{bind}}</math> (Rosetta)<sup>a</sup><br/>(REU)</b> | <b><math>\Delta G_{\text{bind}}</math> (MM-GBSA)<br/>(kcal/mol)</b> | <b><math>\Delta\Delta G_{\text{bind}}</math> (MM-GBSA)<sup>b</sup><br/>(kcal/mol)</b> |
|-------------------------------------|----------------------------------------------------------------------------------|---------------------------------------------------------------------|---------------------------------------------------------------------------------------|
| SPB25 <sub>F8R/Q22R/L25R</sub>      | -0.2                                                                             | -60.2 ± 0.4                                                         | 0.1 ± 0.6                                                                             |
| SPB25 <sub>K11F/Q22R/L25R</sub>     | -2.5                                                                             | -53.7 ± 0.4                                                         | 6.6 ± 0.6                                                                             |
| SPB25 <sub>K11W/Q22R/L25R</sub>     | -1.2                                                                             | -67.8 ± 0.5                                                         | -7.5 ± 0.6                                                                            |
| SPB25 <sub>F8N/K11F/Q22R/L25R</sub> | -6.8                                                                             | -58.7 ± 0.6                                                         | 1.6 ± 0.7                                                                             |
| SPB25 <sub>F8N/K11W/Q22R/L25R</sub> | -4.0                                                                             | -60.2 ± 0.4                                                         | 0.1 ± 0.6                                                                             |
| SPB25 <sub>F8R/K11F/Q22R/L25R</sub> | -2.8                                                                             | -72.2 ± 0.4                                                         | -11.9 ± 0.6                                                                           |
| SPB25 <sub>F8R/K11W/Q22R/L25R</sub> | -3.9                                                                             | -67.4 ± 0.4                                                         | -7.1 ± 0.6                                                                            |

<sup>a</sup> The difference between  $\Delta G_{\text{bind}}$  (Rosetta) of a system and that of SPB25.

<sup>b</sup> The difference between  $\Delta G_{\text{bind}}$  (MM-GBSA) of a system and that of SPB25.

**Table S2:** Hydrogen bond occupations of ACE2, SBP1, SPB25 and designed peptides binding to SARS-CoV-2-RBD.

| Acceptor <sup>a</sup> | DonorH <sup>a</sup> | Donor <sup>a</sup> | Hydrogen bond occupancy (%) |                    |                     |                       |                       |                                |                                     |
|-----------------------|---------------------|--------------------|-----------------------------|--------------------|---------------------|-----------------------|-----------------------|--------------------------------|-------------------------------------|
|                       |                     |                    | ACE2 <sup>36</sup>          | SBP1 <sup>36</sup> | SPB25 <sup>36</sup> | SPB25 <sub>K11F</sub> | SPB25 <sub>Q22R</sub> | SPB25 <sub>F8R/K11W/L25R</sub> | SPB25 <sub>F8R/K11F/Q22R/L25R</sub> |
| A475@O                | S(19)@H             | S(19)@N            | 6.5                         | -                  | -                   | -                     | -                     | -                              | -                                   |
| A475@O                | S(19)@HG            | S(19)@OG           | 59.3                        | -                  | -                   | -                     | -                     | -                              | -                                   |
| S477@OG               | I1(21)@H2           | I1(21)@N           | -                           | -                  | -                   | -                     | -                     | 5.2                            | -                                   |
| S477@OG               | I1(21)@H3           | I1(21)@N           | -                           | -                  | -                   | -                     | -                     | 5.2                            | -                                   |
| E2(22)@O              | N487@HD21           | N487@ND2           | -                           | -                  | -                   | 17.4                  | -                     | -                              | -                                   |
| E2(22)@OE1            | S477@H              | S477@N             | -                           | -                  | -                   | 33.1                  | -                     | -                              | -                                   |
| E2(22)@OE1            | S477@HG             | S477@OG            | -                           | -                  | -                   | 16.6                  | -                     | -                              | -                                   |
| E2(22)@OE1            | T478@H              | T478@N             | -                           | -                  | -                   | 6.5                   | -                     | -                              | -                                   |
| E2(22)@OE1            | T478@HG1            | T478@OG1           | -                           | -                  | -                   | 8.2                   | -                     | -                              | -                                   |
| E2(22)@OE2            | S477@H              | S477@N             | -                           | -                  | -                   | 25.7                  | -                     | -                              | -                                   |
| E2(22)@OE2            | S477@HG             | S477@OG            | -                           | 0.1                | -                   | 13.0                  | -                     | -                              | -                                   |
| E2(22)@OE2            | T478@H              | T478@N             | -                           | -                  | -                   | 15.7                  | -                     | -                              | -                                   |
| E2(22)@OE2            | T478@HG1            | T478@OG1           | -                           | -                  | -                   | 15.9                  | -                     | -                              | -                                   |
| E3(23)@OE1            | Y473@HH             | Y473@OH            | -                           | -                  | -                   | -                     | 7.2                   | -                              | -                                   |
| E3(23)@OE2            | S477@H              | S477@N             | -                           | -                  | 0.3                 | -                     | -                     | 25.7                           | 0.1                                 |
| E3(23)@OE2            | Y473@HH             | Y473@OH            | 0.1                         | -                  | -                   | -                     | 7.4                   | -                              | -                                   |
| A475@O                | Q4(24)@HE21         | Q4(24)@NE2         | -                           | 5.7                | 11.3                | 18.8                  | 8.3                   | 3.0                            | -                                   |
| A475@O                | Q4(24)@HE22         | Q4(24)@NE2         | 5.6                         | -                  | 1.4                 | 7.6                   | -                     | -                              | -                                   |
| N487@ND2              | Q4(24)@HE21         | Q4(24)@NE2         | -                           | 0.8                | 0.4                 | 1.8                   | 6.1                   | 0.4                            | -                                   |
| N487@OD1              | Q4(24)@H            | Q4(24)@N           | -                           | -                  | -                   | 5.7                   | -                     | -                              | -                                   |
| N487@OD1              | Q4(24)@HE21         | Q4(24)@NE2         | -                           | 0.8                | 0.7                 | 7.1                   | 24.4                  | 0.3                            | -                                   |
| Q4(24)@NE2            | S477@H              | S477@N             | 0.5                         | 20.7               | 4.2                 | 0.1                   | 2.9                   | 14.8                           | 56.9                                |
| Q4(24)@NE2            | T478@HG1            | T478@OG1           | -                           | 4.8                | 1.2                 | -                     | 3.3                   | 11.9                           | 0.8                                 |
| Q4(24)@OE1            | N487@HD21           | N487@ND2           | 54.1                        | 7.4                | 11.3                | 5.7                   | 2.6                   | 4.1                            | 18.8                                |
| Q4(24)@OE1            | N487@HD22           | N487@ND2           | -                           | 4.5                | 1.6                 | 0.3                   | 1.6                   | 5.1                            | -                                   |
| Q4(24)@OE1            | T478@H              | T478@N             | -                           | 43.5               | 7.7                 | -                     | 27.5                  | 58.0                           | 88.7                                |
| Q4(24)@OE1            | T478@HG1            | T478@OG1           | -                           | 47.3               | 9.6                 | -                     | 28.0                  | 60.5                           | 96.7                                |
| S477@OG               | Q4(24)@HE22         | Q4(24)@NE2         | -                           | 33.1               | 5.7                 | 0.8                   | 10.1                  | 20.2                           | 72.2                                |
| T478@OG1              | Q4(24)@HE21         | Q4(24)@NE2         | -                           | 3.2                | 6.7                 | -                     | -                     | -                              | -                                   |
| T478@OG1              | Q4(24)@HE22         | Q4(24)@NE2         | -                           | 3.2                | 3.2                 | -                     | 0.6                   | 7.5                            | 0.5                                 |
| N487@OD1              | R8(28)@HE           | R8(28)@NE          | -                           | -                  | -                   | -                     | -                     | 5.4                            | 2.6                                 |
| N487@OD1              | R8(28)@HH12         | R8(28)@NH1         | -                           | -                  | -                   | -                     | -                     | 2.3                            | 58.1                                |
| N487@OD1              | R8(28)@HH21         | R8(28)@NH2         | -                           | -                  | -                   | -                     | -                     | 24.2                           | 3.9                                 |
| N487@OD1              | R8(28)@HH22         | R8(28)@NH2         | -                           | -                  | -                   | -                     | -                     | 8.5                            | 15.2                                |

| Acceptor <sup>a</sup> | DonorH <sup>a</sup> | Donor <sup>a</sup> | Hydrogen bond occupancy (%) |                    |                     |                       |                       |                                |                                     |
|-----------------------|---------------------|--------------------|-----------------------------|--------------------|---------------------|-----------------------|-----------------------|--------------------------------|-------------------------------------|
|                       |                     |                    | ACE2 <sup>36</sup>          | SBP1 <sup>36</sup> | SPB25 <sup>36</sup> | SPB25 <sub>K11F</sub> | SPB25 <sub>Q22R</sub> | SPB25 <sub>F8R/K11W/L25R</sub> | SPB25 <sub>F8R/K11F/Q22R/L25R</sub> |
| R8(28)@NH1            | N487@HD22           | N487@ND2           | -                           | -                  | -                   | -                     | -                     | -                              | 8.0                                 |
| Y489@OH               | R8(28)@HH11         | R8(28)@NH1         | -                           | -                  | -                   | -                     | -                     | 8.9                            | -                                   |
| D10(30)@OD1           | K417@HZ1            | K417@NZ            | 18.3                        | 22.2               | 19.3                | 19.8                  | 15.0                  | 22.6                           | 13.5                                |
| D10(30)@OD1           | K417@HZ2            | K417@NZ            | 18.0                        | 27.2               | 28.9                | 10.7                  | 20.1                  | 17.4                           | 20.8                                |
| D10(30)@OD1           | K417@HZ3            | K417@NZ            | 14.8                        | 14.3               | 23.9                | 9.7                   | 16.6                  | 24.5                           | 29.5                                |
| D10(30)@OD2           | K417@HZ1            | K417@NZ            | 24.2                        | 24.8               | 16.6                | 23.3                  | 14.8                  | 20.1                           | 14.0                                |
| D10(30)@OD2           | K417@HZ2            | K417@NZ            | 23.4                        | 34.2               | 25.0                | 19.7                  | 12.0                  | 16.4                           | 10.2                                |
| D10(30)@OD2           | K417@HZ3            | K417@NZ            | 16.4                        | 19.7               | 21.4                | 17.0                  | 17.1                  | 26.0                           | 11.9                                |
| Q493@OE1              | K11(31)@HZ1         | K11(31)@NZ         | 20.1                        | 12.8               | 30.5                | -                     | 1.8                   | -                              | -                                   |
| Q493@OE1              | K11(31)@HZ2         | K11(31)@NZ         | 20.8                        | 14.3               | 32.9                | -                     | 1.8                   | -                              | -                                   |
| Q493@OE1              | K11(31)@HZ3         | K11(31)@NZ         | 19.2                        | 14.8               | 29.4                | -                     | 2.9                   | -                              | -                                   |
| H14(34)@O             | Q493@HE21           | Q493@NE2           | 9.1                         | 6.8                | 5.7                 | 0.1                   | 0.8                   | 0.1                            | -                                   |
| H14(34)@O             | Q493@HE22           | Q493@NE2           | 0.2                         | 17.9               | 0.1                 | 2.3                   | 53.5                  | 67.2                           | 77.2                                |
| Q493@NE2              | H14(34)@HD1         | H14(34)@ND1        | -                           | -                  | -                   | 20.2                  | -                     | -                              | -                                   |
| E15(35)@OE1           | Q493@HE22           | Q493@NE2           | 38.6                        | 28.6               | 54.4                | -                     | 4.2                   | -                              | 0.2                                 |
| E15(35)@OE2           | Q493@HE22           | Q493@NE2           | 42.9                        | 28.2               | 48.6                | -                     | 4.8                   | -                              | 0.2                                 |
| E17(37)@O             | Y505@HH             | Y505@OH            | -                           | -                  | -                   | -                     | -                     | -                              | 8.9                                 |
| E17(37)@OE1           | Q493@HE22           | Q493@NE2           | -                           | -                  | -                   | 7.4                   | -                     | -                              | -                                   |
| E17(37)@OE1           | R403@HH11           | R403@NH1           | 0.1                         | -                  | -                   | 47.8                  | 41.9                  | -                              | -                                   |
| E17(37)@OE1           | R403@HH12           | R403@NH1           | -                           | 64.4               | -                   | -                     | -                     | 60.7                           | 41.5                                |
| E17(37)@OE1           | R403@HH21           | R403@NH2           | -                           | -                  | -                   | -                     | -                     | 42.4                           | 29.4                                |
| E17(37)@OE1           | R403@HH22           | R403@NH2           | -                           | 44.4               | -                   | 21.7                  | 21.8                  | -                              | -                                   |
| E17(37)@OE1           | Y505@HH             | Y505@OH            | 24.9                        | 0.5                | -                   | 42.9                  | 56.2                  | 75.2                           | 50.5                                |
| E17(37)@OE2           | R403@HH11           | R403@NH1           | -                           | -                  | -                   | 52.9                  | 48.7                  | -                              | -                                   |
| E17(37)@OE2           | R403@HH12           | R403@NH1           | -                           | 27.4               | -                   | -                     | -                     | 38.6                           | 58.1                                |
| E17(37)@OE2           | R403@HH21           | R403@NH2           | -                           | -                  | -                   | -                     | -                     | 26.5                           | 40.7                                |
| E17(37)@OE2           | R403@HH22           | R403@NH2           | -                           | 27.7               | -                   | 24.4                  | 25.6                  | -                              | -                                   |
| E17(37)@OE2           | Y505@HH             | Y505@OH            | 12.1                        | 1.0                | -                   | 51.7                  | 52.8                  | 82.6                           | 53.8                                |
| D18(38)@OD1           | Q493@HE21           | Q493@NE2           | -                           | 6.8                | -                   | 48.9                  | 1.9                   | 3.6                            | 4.9                                 |
| D18(38)@OD1           | R403@HH12           | R403@NH1           | -                           | -                  | 31.2                | -                     | -                     | -                              | -                                   |
| D18(38)@OD1           | R403@HH22           | R403@NH2           | -                           | -                  | 36.1                | -                     | -                     | -                              | -                                   |
| D18(38)@OD1           | Y505@HH             | Y505@OH            | -                           | -                  | 54.6                | -                     | -                     | -                              | -                                   |
| D18(38)@OD2           | Q493@HE21           | Q493@NE2           | -                           | 6.5                | -                   | 42.8                  | 1.6                   | 2.3                            | 5.2                                 |
| D18(38)@OD2           | R403@HH12           | R403@NH1           | -                           | -                  | 49.6                | -                     | -                     | -                              | -                                   |
| D18(38)@OD2           | R403@HH22           | R403@NH2           | -                           | -                  | 73.4                | -                     | -                     | -                              | -                                   |
| D18(38)@OD2           | Y505@HH             | Y505@OH            | -                           | -                  | 19.7                | -                     | -                     | -                              | -                                   |
| F20(40)@O             | N501@HD21           | N501@ND2           | -                           | -                  | -                   | -                     | -                     | -                              | 6.6                                 |
| Y21(41)@O             | G502@H              | G502@N             | -                           | 99.7               | -                   | -                     | -                     | -                              | -                                   |
| Y21(41)@O             | N501@HD21           | N501@ND2           | -                           | -                  | -                   | 94.8                  | 97.8                  | 0.1                            | 44.3                                |

| Acceptor <sup>a</sup> | DonorH <sup>a</sup> | Donor <sup>a</sup> | Hydrogen bond occupancy (%) |                    |                     |                       |                       |                                |                                     |
|-----------------------|---------------------|--------------------|-----------------------------|--------------------|---------------------|-----------------------|-----------------------|--------------------------------|-------------------------------------|
|                       |                     |                    | ACE2 <sup>36</sup>          | SBP1 <sup>36</sup> | SPB25 <sup>36</sup> | SPB25 <sub>K11F</sub> | SPB25 <sub>Q22R</sub> | SPB25 <sub>F8R/K11F/L25R</sub> | SPB25 <sub>F8R/K11F/Q22R/L25R</sub> |
| Y21(41)@O             | Q498@HE22           | Q498@NE2           | -                           | -                  | -                   | 57.8                  | 24.1                  | -                              | -                                   |
| Y21(41)@OH            | G502@H              | G502@N             | -                           | -                  | 84.4                | -                     | -                     | -                              | -                                   |
| Y21(41)@OH            | N501@HD22           | N501@ND2           | 17.5                        | -                  | 5.3                 | -                     | -                     | -                              | -                                   |
| Y21(41)@OH            | Q498@HE21           | Q498@NE2           | 5.5                         | -                  | -                   | -                     | -                     | -                              | -                                   |
| Y21(41)@OH            | T500@HG1            | T500@OG1           | 19.5                        | -                  | -                   | -                     | -                     | -                              | -                                   |
| Y505@O                | Y21(41)@HH          | Y21(41)@OH         | -                           | -                  | -                   | 98.3                  | 99.1                  | 95.8                           | 99.3                                |
| G446@O                | Q22(42)@HE22        | Q22(42)@NE2        | 3.0                         | -                  | 2.2                 | 15.8                  | -                     | -                              | -                                   |
| G446@O                | R22(42)@HH11        | R22(42)@NH1        | -                           | -                  | -                   | -                     | 27.7                  | -                              | -                                   |
| G496@O                | Q22(42)@HE22        | Q22(42)@NE2        | -                           | -                  | 39.8                | 23.1                  | -                     | -                              | -                                   |
| N448@O                | R22(42)@HH12        | R22(42)@NH1        | -                           | -                  | -                   | -                     | 65.0                  | -                              | -                                   |
| N448@O                | R22(42)@HH22        | R22(42)@NH2        | -                           | -                  | -                   | -                     | 27.1                  | -                              | -                                   |
| N501@ND2              | Q22(42)@HE22        | Q22(42)@NE2        | -                           | -                  | 6.9                 | -                     | -                     | -                              | -                                   |
| N501@OD1              | Q22(42)@HE22        | Q22(42)@NE2        | -                           | -                  | 24.2                | -                     | -                     | -                              | -                                   |
| Q/R22(42)@O           | Q498@HE21           | Q498@NE2           | -                           | -                  | 0.8                 | 6.8                   | 0.5                   | 23.5                           | -                                   |
| Q/R22(42)@O           | Q498@HE22           | Q498@NE2           | -                           | -                  | 39.8                | 1.1                   | 0.1                   | 0.1                            | -                                   |
| Q22(42)@NE2           | N501@HD21           | N501@ND2           | -                           | -                  | 11.8                | -                     | -                     | -                              | -                                   |
| Q22(42)@OE1           | N501@HD21           | N501@ND2           | -                           | -                  | 69.1                | -                     | -                     | -                              | -                                   |
| Q22(42)@OE1           | Q498@HE21           | Q498@NE2           | 0.5                         | -                  | 27.1                | 5.7                   | -                     | -                              | -                                   |
| Q22(42)@OE1           | Y449@HH             | Y449@OH            | 2.6                         | -                  | 6.1                 | -                     | -                     | -                              | -                                   |
| Q498@OE1              | Q22(42)@HE21        | Q22(42)@NE2        | -                           | -                  | 16.7                | -                     | -                     | 0.7                            | -                                   |
| S494@OG               | R22(42)@HH22        | R22(42)@NH2        | -                           | -                  | -                   | -                     | 35.4                  | -                              | -                                   |
| Y449@OH               | Q22(42)@HE21        | Q22(42)@NE2        | 5.3                         | -                  | 4.7                 | 1.4                   | -                     | -                              | -                                   |
| Y449@OH               | Q22(42)@HE22        | Q22(42)@NE2        | 0.2                         | -                  | 13.6                | 0.4                   | -                     | -                              | -                                   |
| Y495@O                | R22(42)@HH22        | R22(42)@NH2        | -                           | -                  | -                   | -                     | 5.5                   | -                              | -                                   |
| S23(43)@O             | N501@HD22           | N501@ND2           | -                           | -                  | -                   | 16.7                  | -                     | -                              | -                                   |
| S23(43)@O             | Q498@HE21           | Q498@NE2           | -                           | -                  | -                   | 15.8                  | 6.8                   | -                              | -                                   |
| S23(43)@O             | Q498@HE22           | Q498@NE2           | -                           | -                  | -                   | 17.1                  | 8.5                   | -                              | -                                   |
| S23(43)@O             | T500@HG1            | T500@OG1           | -                           | -                  | 0.1                 | 6.5                   | -                     | -                              | -                                   |
| S23(43)@O             | Y505@HH             | Y505@OH            | -                           | 56.2               | -                   | -                     | -                     | -                              | -                                   |
| S23(43)@OXT           | Y505@HH             | Y505@OH            | -                           | 41.8               | -                   | -                     | -                     | -                              | -                                   |
| N501@OD1              | S24(44)@HG          | S24(44)@OG         | -                           | -                  | -                   | -                     | -                     | 5.8                            | 5.7                                 |
| Q498@OE1              | S24(44)@HG          | S24(44)@OG         | -                           | -                  | -                   | 0.4                   | 6.2                   | -                              | 1.6                                 |
| S24(44)@O             | G502@H              | G502@N             | -                           | -                  | -                   | 0.1                   | -                     | 20.3                           | -                                   |
| S24(44)@OG            | G502@H              | G502@N             | -                           | -                  | -                   | -                     | -                     | 94.8                           | -                                   |
| S24(44)@OG            | N501@HD21           | N501@ND2           | -                           | -                  | -                   | -                     | -                     | -                              | 15.6                                |
| S24(44)@OG            | N501@HD22           | N501@ND2           | -                           | -                  | -                   | -                     | -                     | -                              | 17.6                                |
| S24(44)@OG            | T500@HG1            | T500@OG1           | -                           | -                  | 0.1                 | 6.3                   | 2.3                   | -                              | 0.1                                 |
| T500@OG1              | S24(44)@HG          | S24(44)@OG         | -                           | -                  | -                   | 6.7                   | 5.8                   | -                              | 29.7                                |
| G446@O                | R25(45)@HE          | R25(45)@NE         | -                           | -                  | -                   | -                     | -                     | -                              | 10.5                                |

| Acceptor <sup>a</sup> | DonorH <sup>a</sup> | Donor <sup>a</sup> | Hydrogen bond occupancy (%) |                    |                     |                       |                       |                                |                                     |
|-----------------------|---------------------|--------------------|-----------------------------|--------------------|---------------------|-----------------------|-----------------------|--------------------------------|-------------------------------------|
|                       |                     |                    | ACE2 <sup>36</sup>          | SBP1 <sup>36</sup> | SPB25 <sup>36</sup> | SPB25 <sub>K11F</sub> | SPB25 <sub>Q22R</sub> | SPB25 <sub>F8R/K11W/L25R</sub> | SPB25 <sub>F8R/K11F/Q22R/L25R</sub> |
| G446@O                | R25(45)@HH21        | R25(45)@NH2        | -                           | -                  | -                   | -                     | -                     | -                              | 8.3                                 |
| L/R25(45)@O           | T500@HG1            | T500@OG1           | -                           | -                  | -                   | -                     | 8.9                   | -                              | -                                   |
| L/R25(45)@OXT         | T500@HG1            | T500@OG1           | -                           | -                  | 0.1                 | 0.1                   | 22.4                  | -                              | 0.2                                 |
| T500@O                | L/R25(45)@H         | L/R25(45)@N        | -                           | -                  | -                   | 24.7                  | -                     | -                              | -                                   |
| T500@O                | R25(45)@HH11        | R25(45)@NH1        | -                           | -                  | -                   | -                     | -                     | 14.4                           | -                                   |
| T500@OG1              | L/R25(45)@H         | L/R25(45)@N        | -                           | -                  | -                   | 2.0                   | 20.2                  | -                              | -                                   |
| N487@OD1              | Y(83)@HH            | Y(83)@OH           | 95.4                        | -                  | -                   | -                     | -                     | -                              | -                                   |
| T500@O                | N(330)@HD21         | N(330)@ND2         | 10.4                        | -                  | -                   | -                     | -                     | -                              | -                                   |
| G496@O                | K(353)@HZ1          | K(353)@NZ          | 13.8                        | -                  | -                   | -                     | -                     | -                              | -                                   |
| G496@O                | K(353)@HZ2          | K(353)@NZ          | 18.5                        | -                  | -                   | -                     | -                     | -                              | -                                   |
| G496@O                | K(353)@HZ3          | K(353)@NZ          | 24.4                        | -                  | -                   | -                     | -                     | -                              | -                                   |
| K(353)@O              | G502@H              | G502@N             | 99.7                        | -                  | -                   | -                     | -                     | -                              | -                                   |
| Q498@OE1              | K(353)@HZ1          | K(353)@NZ          | 19.5                        | -                  | -                   | -                     | -                     | -                              | -                                   |
| Q498@OE1              | K(353)@HZ2          | K(353)@NZ          | 23.7                        | -                  | -                   | -                     | -                     | -                              | -                                   |
| Q498@OE1              | K(353)@HZ3          | K(353)@NZ          | 15.8                        | -                  | -                   | -                     | -                     | -                              | -                                   |
| D(355)@OD2            | T500@HG1            | T500@OG1           | 61.9                        | -                  | -                   | -                     | -                     | -                              | -                                   |

<sup>a</sup>The residue number of ACE2 is in parenthesis.
